# Supplementary material for: A Practical Catalyst‐Free Synthesis of 6‐Amino‐4 Alkyl/Aryl‐3‐methyl‐2,4‐dihydropyrano[2,3‐c]pyrazole‐carbonitrile in Aqueous Medium
Source: Hindawi journal article supplement (doi:10.1155/2013/920719), 2012-10-21
Supplement: f1 [file 920719.f1.pdf]

## Supplementary data

### A practical catalyst-free synthesis of 6-amino-4 alkyl/aryl-3-methyl-2,4-dihydropyrano[2,3-*c*]pyrazole-carbonitrile in aqueous medium

Manisha Bihani, Pranjal P Bora and Ghanashyam Bez\*

*Department of Chemistry, North Eastern Hill University, Shillong-793022, India*

**Table 1:** Attempted synthesis of dihydropyrano[2,3-*c*]pyrazole employing reported method<sup>a</sup> by Shi et al.<sup>1</sup>

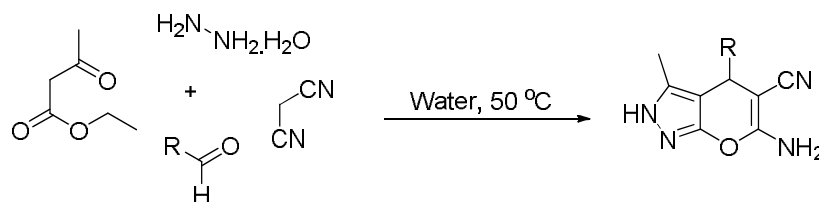

| Entry | Aldehyde | Time(h) | % Yield<br>(Reported <sup>1</sup> ) | % Yield <sup>b</sup><br>(Observed) |
|-------|----------|---------|-------------------------------------|------------------------------------|
| 1     |          | 5       | 85                                  | 53                                 |
| 2     |          | 10      | -                                   | 71                                 |
| 3     |          | 3       | 73                                  | 45                                 |
| 4     |          | 12      | -                                   | 67                                 |
| 5     |          | 2       | 83                                  | 50                                 |
| 6     |          | 8       | -                                   | 68                                 |
| 7     |          | 3       | 75                                  | 47                                 |
| 8     |          | 10      | -                                   | 62                                 |
| 9     |          | 1       | 80                                  | 55                                 |
| 10    |          | 8       | -                                   | 70                                 |

<sup>a</sup>Reaction of equimolar mixture of aryl aldehydes, hydrazine, ethyl acetoacetate and malononitrile in water at 50 °C under high stirring condition; <sup>b</sup>Isolated yield following the reported work-up procedure.

**Table 2:** Attempted synthesis of dihydropyrano[2,3-*c*]pyrazole employing reported method<sup>a</sup> by Reddy et al.<sup>2</sup>

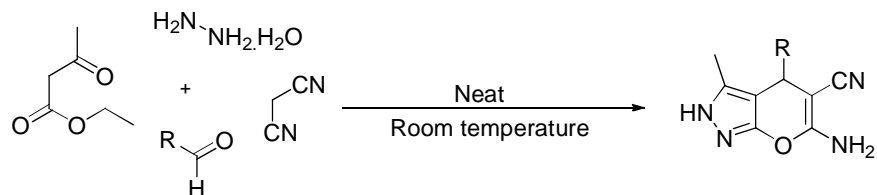

| Entry | Aldehyde | Time   | % Yield<br>(Reported <sup>2</sup> ) | % Yield <sup>b</sup><br>(Observed) |
|-------|----------|--------|-------------------------------------|------------------------------------|
| 1     |          | 5 min  | 83                                  | 45                                 |
| 2     |          | 8 h    | -                                   | 55 <sup>c</sup>                    |
| 3     |          | 6 min  | 53                                  | 34                                 |
| 4     |          | 8 h    | -                                   | 42 <sup>c</sup>                    |
| 5     |          | 8 min  | 58                                  | 37                                 |
| 6     |          | 8 h    | -                                   | 50 <sup>c</sup>                    |
| 7     |          | 10 min | 48                                  | 32                                 |
| 8     |          | 8 h    | -                                   | 47 <sup>c</sup>                    |
| 9     |          | 5 min  | 65                                  | 30                                 |
| 10    |          | 8 h    | -                                   | 42 <sup>c</sup>                    |

<sup>a</sup>Reaction of equimolar mixture of aryl aldehydes, hydrazine, ethyl acetoacetate and malononitrile under vigorous stirring at room temperature; <sup>b</sup>Isolated Yield; <sup>c</sup>Reaction did not complete.

## References

- [1] Y. Zou, H. Wub, Y. Hua, H. Liu, X. Zhao, H. Ji, D. Shi, "A novel and environment-friendly method for preparing dihydropyrano[2,3-*c*]pyrazoles in water under ultrasound irradiation. " *Ultrasonics Sonochemistry*, vol. 18, no. 3, pp. 708-712, 2011.
- [2] A. S. Nagarajan, B. S. R. Reddy, "Synthesis of substituted pyranopyrazoles under neat conditions via a multicomponent reaction " *Synlett*, no. 12, pp. 2002-2004, 2009.
